# Supplementary material
Source: ML conference proceedings conference paper supplement (https://proceedings.neurips.cc/paper_files/paper/2012/hash/f47330643ae134ca204bf6b2481fec47-Abstract.html)
Supplement: Supplementary file 2 [file f47330643ae134ca204bf6b2481fec47-Supplemental.zip]

Archive with 1 entries (1 files):
- lstdp-all.pdf
